# Supplementary material for: A specialized condensin complex participates in somatic nuclear maturation in Tetrahymena thermophila
Source: PubMed Central journal article supplement — Mol Biol Cell. 2019 May 15;30(11):1326–38. doi: 10.1091/mbc.E18-08-0487 (PMC6724606; doi:10.1091/mbc.e18-08-0487), 2019-05-15
Supplement: mbc-30-1326-s001.pdf [file mbc-30-1326-s001.pdf]

# Supplemental Materials

*Molecular Biology of the Cell*

Howard-Till et al.

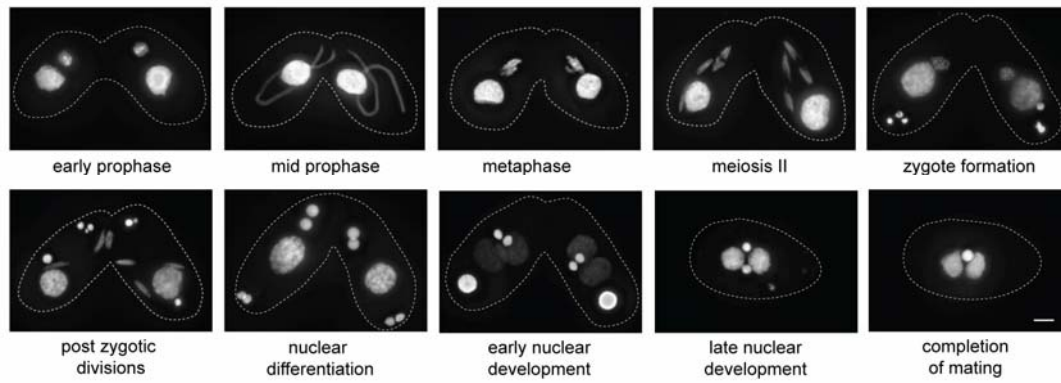

**Figure S1.** Cytology of mating *Tetrahymena* cells. Sexually reproducing cells undergo a synchronized meiosis and after zygote formation, the new progeny cells initiate the developmental program in two new SN. Prior to re-feeding, cells arrest with two SN and one GN. Scale bar, 5  $\mu\text{m}$ .

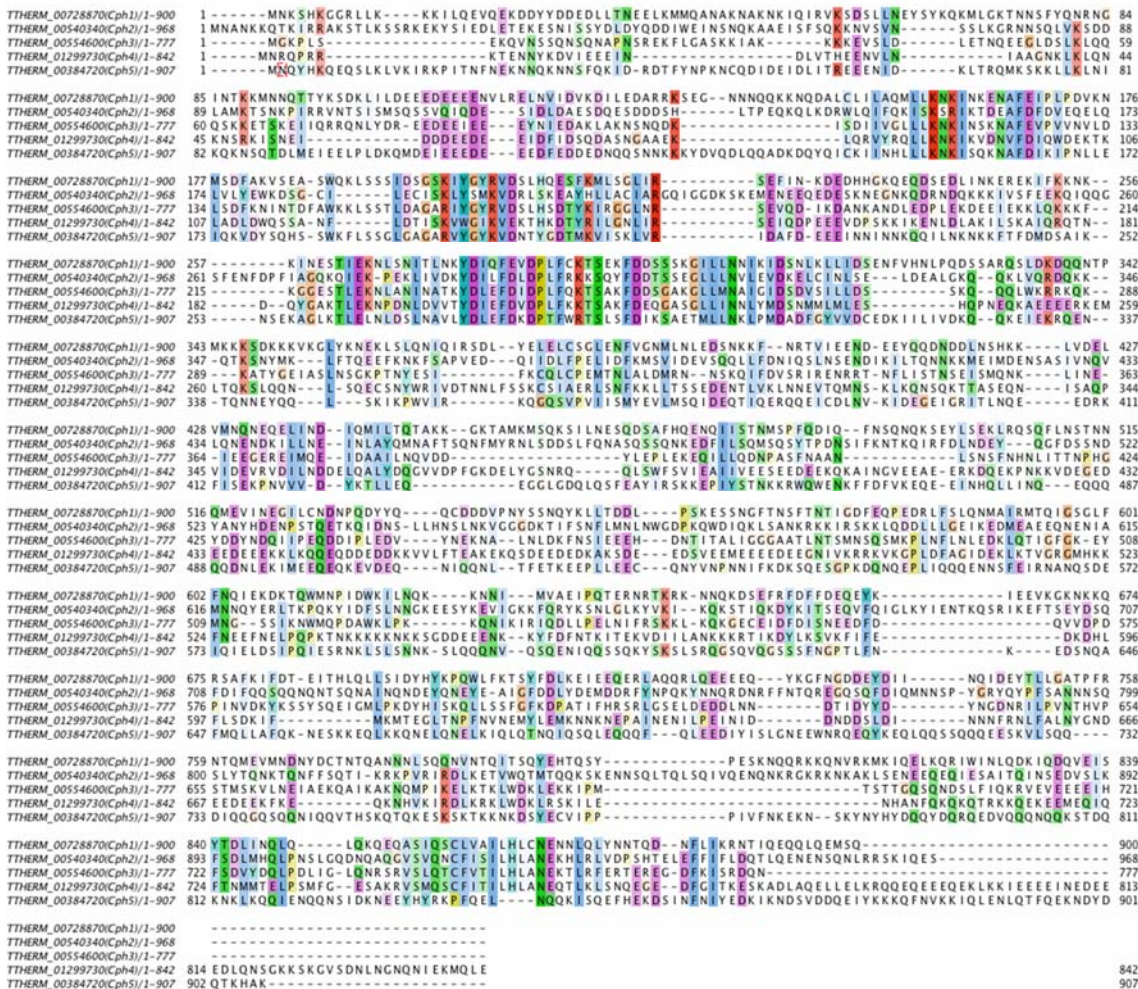

**Figure S2.** Multiple sequence alignment of *Tetrahymena* Cph proteins. Alignment was produced using the MUSCLE tool from EMBL-EBI (Edgar, 2004). The first 97 aa of Cph5 is shown aligned with the full length proteins of Cph1-4.

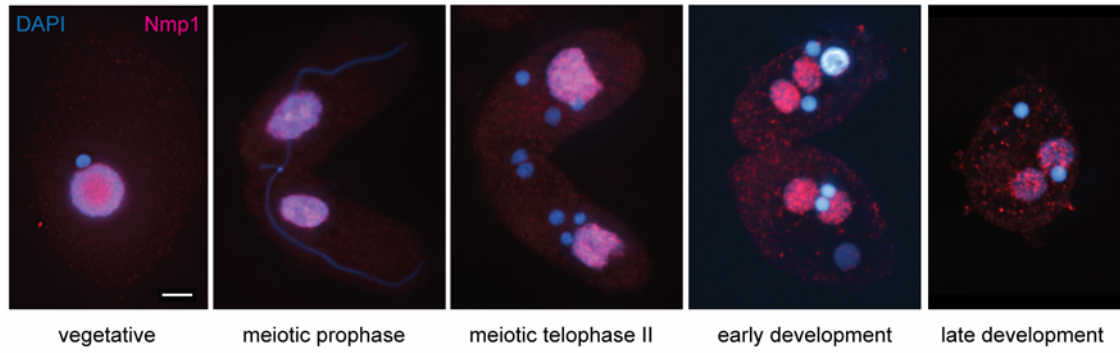

**Figure S3.** Nmp1 localizes to SN at all stages. Nmp1-HA (red) was visualized by immunostaining throughout development. Scale bar, 5  $\mu$ m.

**Table S1.** Proteins associated with Nmp1<sup>1</sup>.

| Protein ID            | Name/function                                                        | # peptides |
|-----------------------|----------------------------------------------------------------------|------------|
| THERM_00222270        | Nmp1                                                                 | 505        |
| THERM_00239400        | SET domain protein                                                   | 389        |
| THERM_00310340        | PHD zinc finger protein                                              | 301        |
| THERM_00145290        | Aap6, SAGA complex member                                            | 177        |
| <b>THERM_00384720</b> | <b>Cph5</b>                                                          | 108        |
| THERM_00790730        | Ada2, SAGA complex member                                            | 72         |
| THERM_00668050        | transmembrane protein, putative<br>Hat2,<br>histoneacetyltransferase | 49         |
| THERM_00248390        | GCN5                                                                 | 29         |
| <b>THERM_00392760</b> | <b>Cpd2</b>                                                          | 25         |
| <b>THERM_00812950</b> | <b>Smc2</b>                                                          | 19         |
| THERM_00242010        | TRAF-type zinc finger protein                                        | 13         |
| THERM_00049310        | Chd3, SNF2 family amine-terminal protein                             | 13         |
| THERM_00475080        | peptidase M1 family aminopeptidase                                   | 12         |
| THERM_01146030        | catalaseheme-binding enzyme                                          | 12         |
| THERM_00257000        | hypothetical protein                                                 | 10         |
| THERM_01093510        | Scd6-like-Sm domain protein                                          | 10         |

<sup>1</sup>Condensin proteins are designated in bold text.

**Table S2.** Sequences of primers.**Epitope tagging**

|                 |                                                      |
|-----------------|------------------------------------------------------|
| CAPD2stopRV-GFP | aagttcttcacccttagaaaccatggatccaaactcctcatcaaagtcac   |
| CAPD2-3'FW      | atgggcccgagaagcctaaccctaac                           |
| CAPD2-3'UTR-RV  | tactcgaggccttttctcatatgttgaacg                       |
| CAPD2-3'UTR-FW  | cccggggatctgaattcgatatcaagctttatgtgtgaatgtctaaacaac  |
| Brn5ctermFW     | ctcgagttttcagcaagatcttgagaagtattccatacc              |
| Brn5stopRV      | gaacatcataaggataggatccatctttaaagatataaaaattttatccttc |
| Brn5_3FW        | ggatctgaattcgatatcaagcttgaaacatctcatgtttaataaatt     |
| Brn5_3RV        | ggagatcttctagaaagatgaagcatattggcaaataattac           |
| Nmp1ctermFW     | ctcgagttttcagcaagatgaagtttaaaatgtttaatcagaag         |
| Nmp1stopRV      | GAACATCATAAGGATAGGATCCttggttgtttagaactgc             |
| Nmp1_3FW        | ggatctgaattcgatatcaagcttctgttagaaaagtattaattagcattg  |
| Nmp1_3RV        | ggagatcttctagaaagatcaaatttctgaattcagagc              |

**RNAi**

|            |                                |
|------------|--------------------------------|
| CAPD2FWapa | atgggcccgtgaagctgatcctaaccg    |
| CAPD2RVxho | tactcgagcatcaacagcaccaccttc    |
| CAPD2FWpme | cgtttaaacgtgaagctgatcctaaccg   |
| CAPD2RVxma | taccgggcatcaacagcaccaccttc     |
| Brn5ifwApa | atgggcccgatagatgaaggtgaaattgg  |
| Brn5ifwPme | cgtttaaacgatagatgaaggtgaaattgg |
| Brn5irvXho | tactcgagcttttgaccagattcttgag   |
| Brn5irvXma | taccgggcttttgaccagattcttgag    |

**CRISPR construct**

|                  |                          |
|------------------|--------------------------|
| CapD2Cas9T3s     | agttgaagctcatcaaaataagaa |
| CapD2Cas9T3as    | aaacttctatgtgatgagcttc   |
| CapD2del11FW     | gacgaagcagaaaggtaag      |
| CapD2crisprSeqRV | ccacctgtattcttttgcc      |

**IES PCR**

|                |                                                     |
|----------------|-----------------------------------------------------|
| Scc3 5'flankFW | gaaagaagattcttttggtg                                |
| Scc3 5'flankRV | caccaaagaatcttcttc                                  |
| Scc3 ies FW    | gctttaagtagttatccaac                                |
| M002           | agcttaacaaatgcatattgag                              |
| M1194          | gtggggagggagaaggattcaac                             |
| 55122451_FW    | agctttaagaaatagagaatgaataa                          |
| 55122451_RV    | tccatcgcttcataacttt                                 |
| CapD2 3'UTR-FW | cccggggatctgaattcgatatcaagctttatgtgtgaatgtctaaacaac |
| CapD2 3'UTR-RV | tactcgaggccttttctcatatgttgaacg                      |
| CapD2 ies RV2  | cagggttgagaaaacatgg                                 |
| IES 7 MDSL-112 | ggattgattggcataaatgga                               |

|                |                           |
|----------------|---------------------------|
| IES 7 MDSR-158 | aagcccagaataccgcagttc     |
| IES 11 MDSL-42 | gggcacaatataactaaggcaattt |
| IES 11 MDSR    | gggcacgttgataccagttt      |

**Supplemental data.** Mass spectrometry data sets for immunoprecipitations of Cpd1-HA, Nmp1-HA, and Cpd2-HA. Sheet 1 includes data sets for samples prepared from vegetative WT cells and vegetative and 14 h mating cells expressing Cpd2-HA. Sheet 2 contains data from vegetative Cpd1-HA cells and 14 h Nmp1-HA, compared with vegetative or 14 h mating WT cells. Sheet 3 contains data from IPs of HA-Cph4 at 8 h of mating, compared with 8 h mating WT cells.
